# Supplementary material
Source: publisher site journal article supplement (https://www.dovepress.com/article/243197)
Supplement: Supplementary file 1 [file get_supplementary_file.php]

**Figure S1**

**
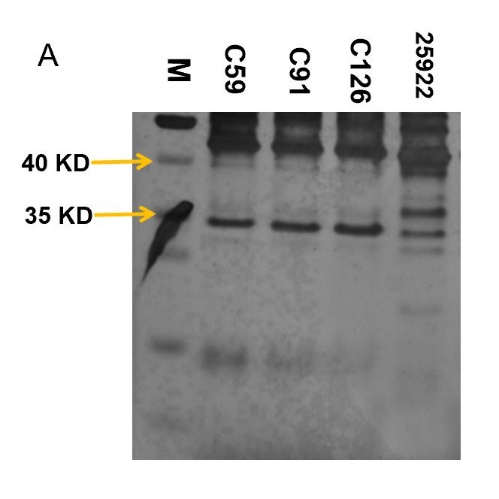
**

**
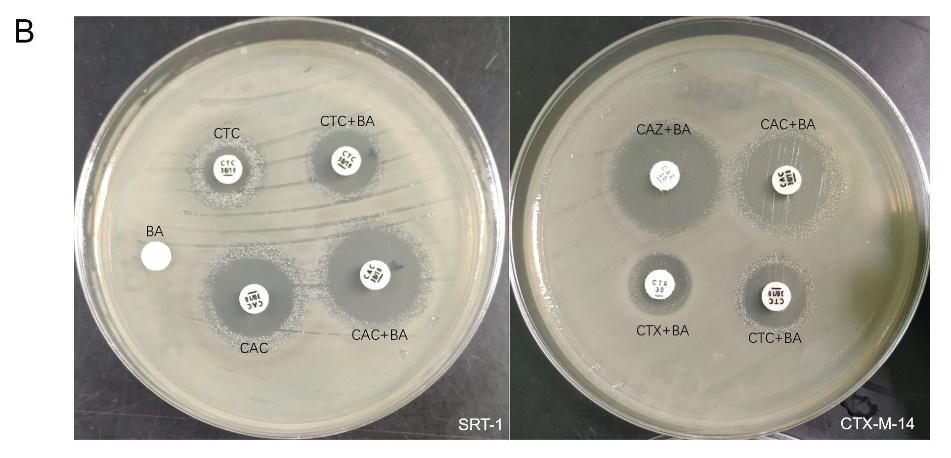
**


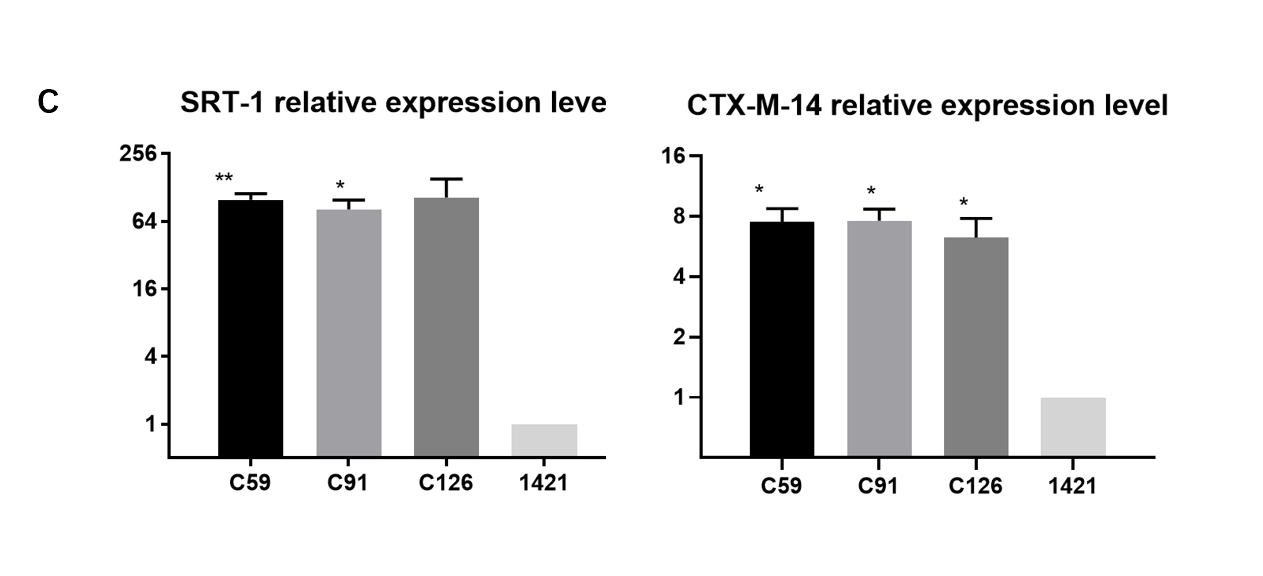


**Figure S1. Detection of the expression of the outer membrane proteins ompF, ompC, SRT-1, and CTX-M-14 in isolates C59, C91, and C126** (A). The expression of ompF and ompC by SDS-PAGE and silver staining. M: marker, (B). The expression of *blaSRT-1* and *blaCTX-M-14* by the disk diffusion test. The figure shows the result of C59, which is consistent with the result of the other two isolates. (C). The relative expression of *blaSRT-1* and *blaCTX-M-14* by qPCR. Isolate 1421 was selected as a control harbouring *blaCTX-M-14* and *blaSRT-1*. *: P <0.05; **: P<0.01.

**Figure S2**


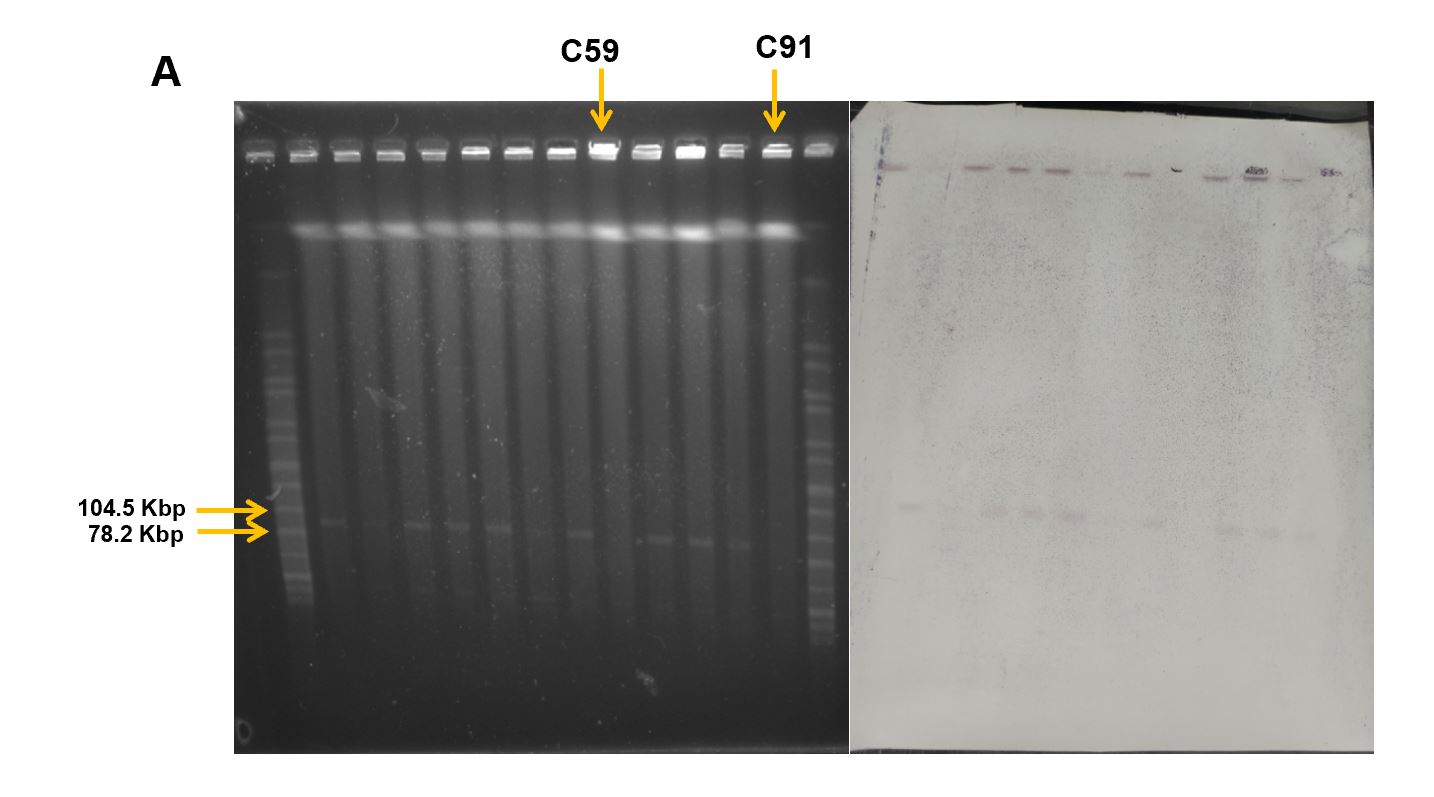

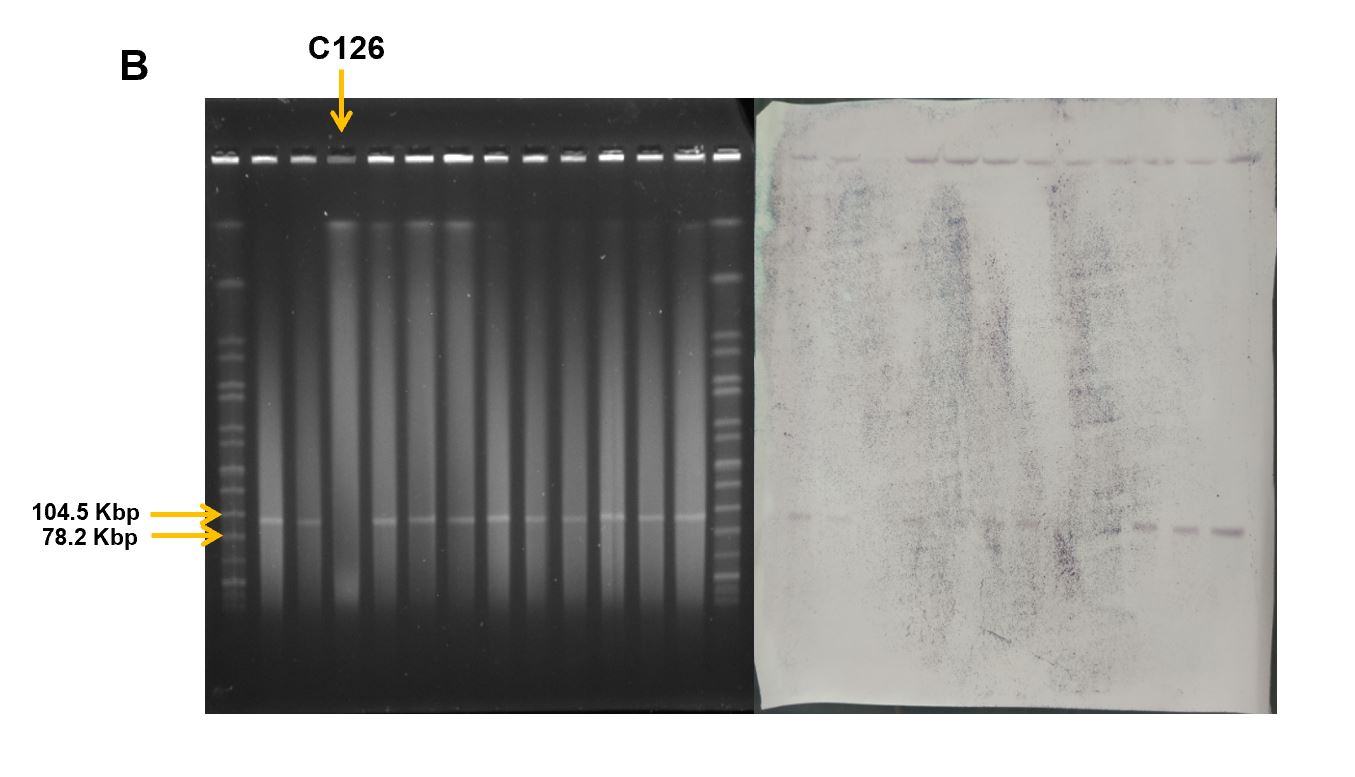

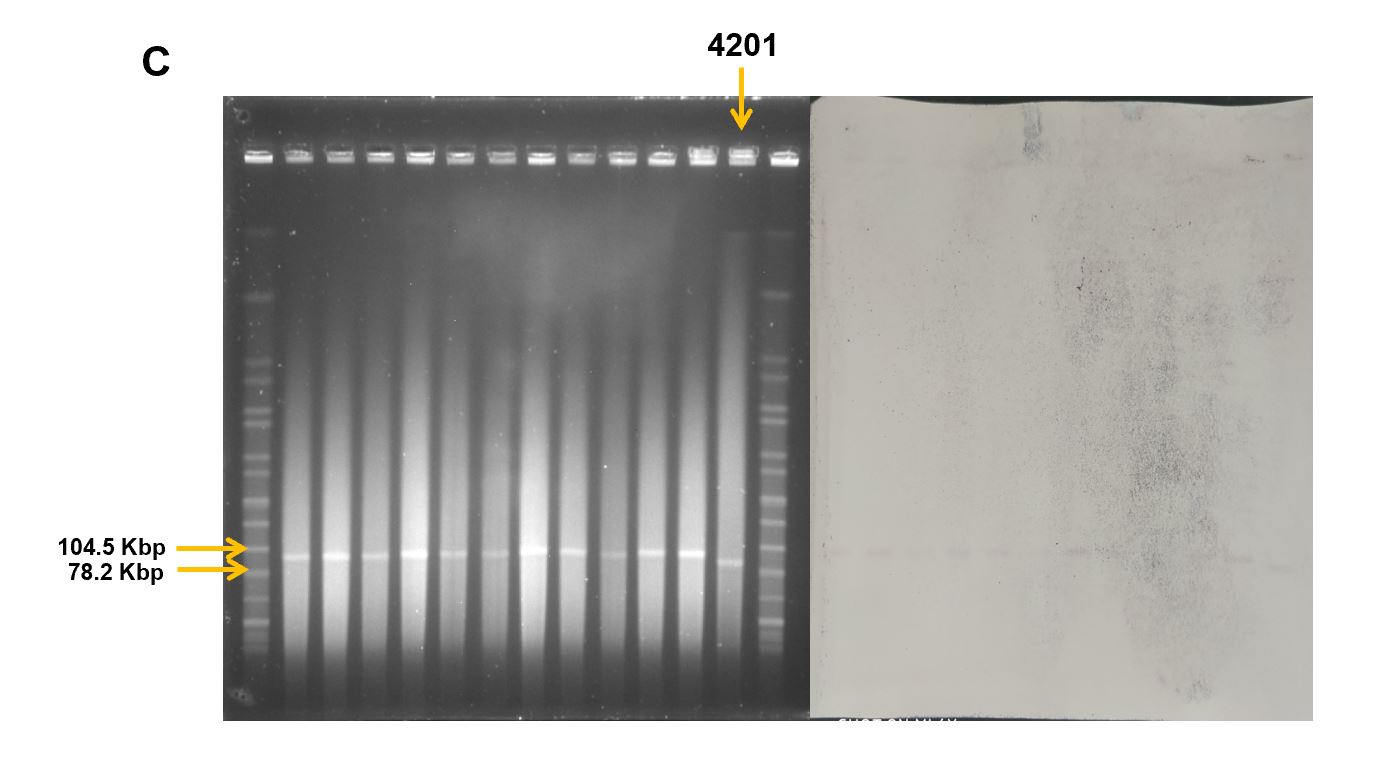


**Figure S2. The *blaKPC-2* gene was found in 33 isolatesand localized on an ~78-104 Kbp plasmid, which was detected by S1 Southern blot** (A). Order of isolates from left to right: Marker, C3, C5, C8, C21, C40, C45, C47, C59, C60, C64, C83, C91, Marker. (B). Order of isolates from left to right: Marker, C110, C112, C126, C141, C153, C156, 939, 1140, 972, 1203, 1330, 1486, Marker. (C). Order of isolates from left to right: Marker, 1614, 1758, 2079, 2291, 2686, 2730, 2838, 3024, 3410, 3717, 3725, 4201, Marker. The left side (gel image) was matched with the right side (Southern blot photo) in each figure. H9812 was selected as the size marker.

**Figure S3**


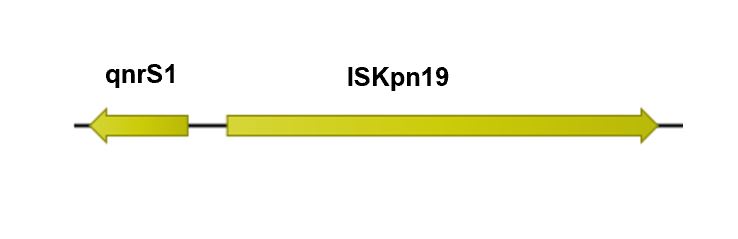


**Figure S3. A schematic diagram of the segment containing the qnr gene in the *blaKPC-2*-harbouring plasmid.** The segment was present in all *blaKPC-2*-harbouring plasmids except plasmid p4201-KPC. Genes *qnrS1* and *ISKpn19* were connected in the line with divergent transcription.
